# Supplementary material for: Barriers to Follow-Up for Abnormal Papanicolaou Smears among Female Sex Workers in Lima, Peru
Source: PubMed Central journal article supplement (PMC5217960; doi:10.1371/journal.pone.0169327), 2017-01-06
Supplement: pone.0169327.s001.pdf [file pone.0169327.s001.pdf]

## Seguimiento al VPH entre trabajadoras sexuales en el Perú – Cuestionario

1. Número de identificación \_\_\_\_\_

### Sección I – Información Demográfica

2. Año de Nacimiento \_\_\_\_\_

3. Lugar de Nacimiento \_\_\_\_\_;  
(Pueblo/ciudad; país)

4. Educación \_0 Iltrado  
\_1 Letrado

5. Nivel de educación completado \_1 Título Profesional  
\_2 Título Universitario  
\_3 Escuela Secundaria  
\_4 Parte de Escuela Secundaria  
\_5 Escuela Primaria  
 Parte de Escuela Primaria

6. Total de años como trabajadora sexual \_\_\_\_\_ Años

7. Estado de registro \_1 Registrada \_0 No registrada

8. Ingreso Mensual (soles) \_1 <1000  
\_2 1,001-2,000  
\_3 2,001-5,000  
\_4 5,001-10,000  
\_5 >10,000  
\_9 No sabe

9. Estado Civil \_1 Soltera  
\_2 Casada  
\_3 Conviviente (no casada)  
\_4 Divorciada/separada  
\_5 Viuda

10. Edad de la primera relación sexual \_\_\_\_\_ años

11. Número de embarazos \_\_\_\_\_

12. Número de abortos \_\_\_\_\_

13. Número de hijos vivos \_\_\_\_\_

### Sección II – Historia de análisis y tratamientos para infecciones de transmisión sexual:

14. ¿Alguna vez tuvo resultados positivos para alguna ETS? \_1 Si \_0 No

**Virus de Papiloma Humano**

15. ¿Alguna vez dio positivo al virus del papiloma humano? 1 S 0N Si no, pase al 16.

15<sup>a</sup>1. De ser Sí, ¿Dónde se realizó el examen positivo?

1 Centro de Salud Alberto Barton del Callao

2 Otro lugar en Peru \_\_\_\_\_

3 Otro pais \_\_\_\_\_

15<sup>a</sup>2. ¿Recibió tratamiento?

1 S 0N Si no, pase al 15h.

De ser Sí:

15b. ¿Qué tratamiento recibió?

15b1. Medicina Oral 1 S 0 N

15b2. Medicina por inyección 1 S 0 N

15b3. Colposcopia 1 S 0 N

15b4. Cirugía 1 S 0 N

15b5. Consejería 1 S 0 N

15b6. No sabe 1 S 0 N

15c. ¿Dónde recibió el tratamiento?

15c1. Clínica Barton 1 S 0 N

15c2. Centro de derivación 1 S 0 N

15c3. Hospital Local 1 S 0 N

15c4. Otro \_\_\_\_\_ 1 S 0 N

15d. ¿Por qué fue a ese lugar?

15d1. Clínica de derivación 1 S 0 N

15d2. Ubicación conveniente 1 S 0 N

15d3. Amigo lo recomendó 1 S 0 N

15d4. Otro \_\_\_\_\_ 1 S 0 N

15e. ¿Cuánto tiempo pasó entre la fecha de su chequeo y la fecha de su primera cita para el tratamiento?

1 <2 semanas

2 2 semanas-1 mes

3 1-3 meses

4 3-6 meses

5 6 meses-1 año

6 >1 año

9 No sabe

15f. ¿Fue informada de sus resultados? 1 S 0 N

15f1. De ser Sí, ¿Qué le dijeron?

\_\_\_\_\_

15g. ¿Se le pidió que regrese para realizar un seguimiento? 1 S 0N

15g1. De ser así, ¿Cuál es la frecuencia del seguimiento? \_\_\_\_\_

**Si no recibió tratamiento:**

15h. ¿Por qué no recibió un seguimiento?

15h1. No sabía a donde ir 1 S 0 N

15h2. Era difícil llegar al lugar 1 S 0 N

15h3. El costo era muy alto 1 S 0 N

15h4. No pensó que el tratamiento era importante 1 S 0 N

15h5. No tenía tiempo 1 S 0 N

15h6. Ansiedad/ Miedo 1 S 0 N

15h7. Otro (especificar) \_\_\_\_\_ 1 S 0 N

**Cervicitis****16. ¿Alguna vez dio positivo para cervicitis?** **1 S**    **0 N Si no, pase a la 17**16<sup>a</sup>1. De ser Sí, ¿Dónde se realizó el examen positivo? **1 Centro de Salud Alberto Barton del Callao** **2 Otro lugar en Peru \_\_\_\_\_** **3 Otro pais \_\_\_\_\_**16<sup>a</sup>2. ¿Recibió tratamiento? **1 S**    **0 N Si no, pase a la 16h.**

De ser Sí:

16b. ¿Qué tratamiento recibió?

16b1. Medicina Oral  **1 S**    **0 N**16b2. Medicina por inyección  **1 S**    **0 N**16b3. Colposcopia  **1 S**    **0 N**16b4. Cirugía  **1 S**    **0 N**16b5. Consejería  **1 S**    **0 N**16b6. No sabe  **1 S**    **0 N**

16c. ¿Dónde recibió el tratamiento?

16c1. Clínica Barton  **1 S**    **0 N**16c2. Centro de derivación  **1 S**    **0 N**16c3. Hospital Local  **1 S**    **0 N**16c4. Otro \_\_\_\_\_  **1 S**    **0 N**

16d. ¿Por qué fue a ese lugar?

16d1. Clínica de derivación  **1 S**    **0 N**16d2. Ubicación conveniente  **1 S**    **0 N**16d3. Amigo lo recomendó  **1 S**    **0 N**16d4. Otro \_\_\_\_\_  **1 S**    **0 N**

16e. ¿Cuánto tiempo pasó entre la fecha de su chequeo y la fecha de su primera cita para el tratamiento?

 **1 <2 semanas** **2 2 semanas-1 mes** **3 1-3 meses** **4 3-6 meses** **5 6 meses-1 año** **6 >1 año** **9 No sabe**

16f. ¿Fue informada de sus resultados?

 **1 S**    **0 N**16f1. De ser Sí, ¿Qué le dijeron?  
\_\_\_\_\_

16g. ¿Se le pidió que regrese para realizar un seguimiento?

 **1 S**    **0 N**

16g1. De ser así, ¿Cuál es la frecuencia del seguimiento? \_\_\_\_\_

**Si no recibió tratamiento:**

16h. ¿Por qué no recibió un seguimiento?

16h1. No sabía a donde ir  **1 S**    **0 N**16h2. Era difícil llegar al lugar  **1 S**    **0 N**16h3. El costo era muy alto  **1 S**    **0 N**16h4. No pensó que el tratamiento era importante  **1 S**    **0 N**16h5. No tenía tiempo  **1 S**    **0 N**16h6. Ansiedad/ Miedo  **1 S**    **0 N**16h7. Otro (especificar) \_\_\_\_\_  **1 S**    **0 N**

**Sífilis****17. ¿Alguna vez dio positivo para Sífilis?** **1 S**    **0 N Si no, pase a la 18**17<sup>a</sup>1. De ser Si, ¿Dónde se realizó el examen positivo? **1** Centro de Salud Alberto Barton del Callao **2** Otro lugar en Peru \_\_\_\_\_ **3** Otro pais \_\_\_\_\_17<sup>a</sup>2. ¿Recibió tratamiento? **1 S**    **0 N Si no, pase a la 17h.**

De ser Sí:

17b. ¿Qué tratamiento recibió?

17b1. Medicina Oral  **1 S**    **0 N**17b2. Medicina por inyección  **1 S**    **0 N**17b3. Colposcopia  **1 S**    **0 N**17b4. Cirugía  **1 S**    **0 N**17b5. Consejería  **1 S**    **0 N**17b6. No sabe  **1 S**    **0 N**

17c. ¿Dónde recibió el tratamiento?

17c1. Clínica Barton  **1 S**    **0 N**17c2. Centro de derivación  **1 S**    **0 N**17c3. Hospital Local  **1 S**    **0 N**17c4. Otro \_\_\_\_\_  **1 S**    **0 N**

17d. ¿Por qué fue a ese lugar?

17d1. Clínica de derivación  **1 S**    **0 N**17d2. Ubicación conveniente  **1 S**    **0 N**17d3. Amigo lo recomendó  **1 S**    **0 N**17d4. Otro \_\_\_\_\_  **1 S**    **0 N**

17e. ¿Cuánto tiempo pasó entre la fecha de su chequeo y la fecha de su primera cita para el tratamiento?

 **1** <2 semanas **2** 2 semanas-1 mes **3** 1-3 meses **4** 3-6 meses **5** 6 meses-1 año **6** >1 año **9** No sabe

17f. ¿Fue informada de sus resultados?

 **1 S**    **0 N**

17f1. De ser Si, ¿Qué le dijeron?

\_\_\_\_\_

17g. ¿Se le pidió que regrese para realizar un seguimiento?

 **1 S**    **0 N**

17g1. De ser así, ¿Cuál es la frecuencia del seguimiento? \_\_\_\_\_

**Si no recibió tratamiento:**

17h. ¿Por qué no recibió un seguimiento?

17h1. No sabía a donde ir  **1 S**    **0 N**17h2. Era difícil llegar al lugar  **1 S**    **0 N**17h3. El costo era muy alto  **1 S**    **0 N**17h4. No pensó que el tratamiento era importante  **1 S**    **0 N**17h5. No tenía tiempo  **1 S**    **0 N**17h6. Ansiedad/ Miedo  **1 S**    **0 N**17h7. Otro (especificar) \_\_\_\_\_  **1 S**    **0 N**

**Vaginosis Bacteriana**

18. ¿Alguna vez dio positivo para Vaginosis Bacteriana? 1 S 0N Si no, pase a la 19

18<sup>a</sup>1. De ser Sí, ¿Dónde se realizó el examen positivo?

1 Centro de Salud Alberto Barton del Callao

2 Otro lugar en Peru \_\_\_\_\_

3 Otro pais \_\_\_\_\_

18<sup>a</sup>2. ¿Recibió tratamiento?

1 S 0N Si no, pase a la 18h.

De ser Sí:

18b. ¿Qué tratamiento recibió?

18b1. Medicina Oral 1 S 0 N

18b2. Medicina por inyección 1 S 0 N

18b3. Colposcopia 1 S 0 N

18b4. Cirugía 1 S 0 N

18b5. Consejería 1 S 0 N

18b6. No sabe 1 S 0 N

18c. ¿Dónde recibió el tratamiento?

18c1. Clínica Barton 1 S 0 N

18c2. Centro de derivación 1 S 0 N

18c3. Hospital Local 1 S 0 N

18c4. Otro \_\_\_\_\_ 1 S 0 N

18d. ¿Por qué fue a ese lugar?

18d1. Clínica de derivación 1 S 0 N

18d2. Ubicación conveniente 1 S 0 N

18d3. Amigo lo recomendó 1 S 0 N

18d4. Otro \_\_\_\_\_ 1 S 0 N

18e. ¿Cuánto tiempo pasó entre la fecha de su chequeo y la fecha de su primera cita para el tratamiento?

1 <2 semanas

2 2 semanas-1 mes

3 1-3 meses

4 3-6 meses

5 6 meses-1 año

6 >1 año

9 No sabe

18f. ¿Fue informada de sus resultados? 1 S 0 N

18f1. De ser Sí, ¿Qué le dijeron?

\_\_\_\_\_

18g. ¿Se le pidió que regrese para realizar un seguimiento? 1 S 0N

18g1. De ser así, ¿Cuál es la frecuencia del seguimiento? \_\_\_\_\_

**Si no recibió tratamiento:**

18h. ¿Por qué no recibió un seguimiento?

18h1. No sabía a donde ir 1 S 0 N

18h2. Era difícil llegar al lugar 1 S 0 N

18h3. El costo era muy alto 1 S 0 N

18h4. No pensó que el tratamiento era importante 1 S 0 N

18h5. No tenía tiempo 1 S 0 N

18h6. Ansiedad/ Miedo 1 S 0 N

18h7. Otro (especificar) \_\_\_\_\_ 1 S 0 N

**Tricomoniasis****19. ¿Alguna vez dio positivo para Tricomoniasis?**1 S0 N Si no, pase a la 2019<sup>a</sup>1. De ser Sí, ¿Dónde se realizó el examen positivo?1 Centro de Salud Alberto Barton del Callao2 Otro lugar en Peru \_\_\_\_\_3 Otro pais \_\_\_\_\_19<sup>a</sup>2. ¿Recibió tratamiento?1 S0 N Si no, pase a la 19h.

De ser Sí:

19b. ¿Qué tratamiento recibió?

19b1. Medicina Oral 1 S 0 N19b2. Medicina por inyección 1 S 0 N19b3. Colposcopia 1 S 0 N19b4. Cirugía 1 S 0 N19b5. Consejería 1 S 0 N19b6. No sabe 1 S 0 N

19c. ¿Dónde recibió el tratamiento?

19c1. Clínica Barton 1 S 0 N19c2. Centro de derivación 1 S 0 N19c3. Hospital Local 1 S 0 N19c4. Otro \_\_\_\_\_ 1 S 0 N

19d. ¿Por qué fue a ese lugar?

19d1. Clínica de derivación 1 S 0 N19d2. Ubicación conveniente 1 S 0 N19d3. Amigo lo recomendó 1 S 0 N19d4. Otro \_\_\_\_\_ 1 S 0 N

19e. ¿Cuánto tiempo pasó entre la fecha de su chequeo y la fecha de su primera cita para el tratamiento?

1 <2 semanas2 2 semanas-1 mes3 1-3 meses4 3-6 meses5 6 meses-1 año6 >1 año9 No sabe

19f. ¿Fue informada de sus resultados?

1 S0 N19f1. De ser Sí, ¿Qué le dijeron?  
\_\_\_\_\_

19g. ¿Se le pidió que regrese para realizar un seguimiento?

1 S0 N

19g1. De ser así, ¿Cuál es la frecuencia del seguimiento? \_\_\_\_\_

**Si no recibió tratamiento:**

19h. ¿Por qué no recibió un seguimiento?

19h1. No sabía a donde ir 1 S 0 N19h2. Era difícil llegar al lugar 1 S 0 N19h3. El costo era muy alto 1 S 0 N19h4. No pensó que el tratamiento era importante 1 S 0 N19h5. No tenía tiempo 1 S 0 N19h6. Ansiedad/ Miedo 1 S 0 N19h7. Otro (especificar) \_\_\_\_\_ 1 S 0 N

**Candida/Hongos****20. ¿Alguna vez dio positivo para Candida/Hongos?**1 S0 N Si no, pase a la 2120<sup>a</sup>1. De ser Sí, ¿Dónde se realizó el examen positivo?1 Centro de Salud Alberto Barton del Callao2 Otro lugar en Peru \_\_\_\_\_3 Otro pais \_\_\_\_\_20<sup>a</sup>2. ¿Recibió tratamiento?1 S0 N Si no, pase a la 20h.

De ser Sí:

20b. ¿Qué tratamiento recibió?

20b1. Medicina Oral 1 S 0 N20b2. Medicina por inyección 1 S 0 N20b3. Colposcopia 1 S 0 N20b4. Cirugía 1 S 0 N20b5. Consejería 1 S 0 N20b6. No sabe 1 S 0 N

20c. ¿Dónde recibió el tratamiento?

20c1. Clínica Barton 1 S 0 N20c2. Centro de derivación 1 S 0 N20c3. Hospital Local 1 S 0 N20c4. Otro \_\_\_\_\_ 1 S 0 N

20d. ¿Por qué fue a ese lugar?

20d1. Clínica de derivación 1 S 0 N20d2. Ubicación conveniente 1 S 0 N20d3. Amigo lo recomendó 1 S 0 N20d4. Otro \_\_\_\_\_ 1 S 0 N

20e. ¿Cuánto tiempo pasó entre la fecha de su chequeo y la fecha de su primera cita para el tratamiento?

1 <2 semanas2 2 semanas-1 mes3 1-3 meses4 3-6 meses5 6 meses-1 año6 >1 año9 No sabe

20f. ¿Fue informada de sus resultados?

1 S0 N20f1. De ser Sí, ¿Qué le dijeron?  
\_\_\_\_\_

20g. ¿Se le pidió que regrese para realizar un seguimiento?

1 S0 N

20g1. De ser así, ¿Cuál es la frecuencia del seguimiento? \_\_\_\_\_

**Si no recibió tratamiento:**

20h. ¿Por qué no recibió un seguimiento?

20h1. No sabía a donde ir 1 S 0 N20h2. Era difícil llegar al lugar 1 S 0 N20h3. El costo era muy alto 1 S 0 N20h4. No pensó que el tratamiento era importante 1 S 0 N20h5. No tenía tiempo 1 S 0 N20h6. Ansiedad/ Miedo 1 S 0 N20h7. Otro (especificar) \_\_\_\_\_ 1 S 0 N

**Herpes Genital****21. ¿Alguna vez dio positivo para VIH?**1 S0 N Si no, pase a la 2221<sup>a</sup>1. De ser Sí, ¿Dónde se realizó el examen positivo?1 Centro de Salud Alberto Barton del Callao2 Otro lugar en Peru \_\_\_\_\_3 Otro pais \_\_\_\_\_21<sup>a</sup>2. ¿Recibió tratamiento?1 S0 N Si no, pase a la 21h.

De ser Sí:

21b. ¿Qué tratamiento recibió?

21b1. Medicina Oral 1 S 0 N21b2. Medicina por inyección 1 S 0 N21b3. Colposcopia 1 S 0 N21b4. Cirugía 1 S 0 N21b5. Consejería 1 S 0 N21b6. No sabe 1 S 0 N

21c. ¿Dónde recibió el tratamiento?

21c1. Clínica Barton 1 S 0 N21c2. Centro de derivación 1 S 0 N21c3. Hospital Local 1 S 0 N21c4. Otro \_\_\_\_\_ 1 S 0 N

21d. ¿Por qué fue a ese lugar?

21d1. Clínica de derivación 1 S 0 N21d2. Ubicación conveniente 1 S 0 N21d3. Amigo lo recomendó 1 S 0 N21d4. Otro \_\_\_\_\_ 1 S 0 N

21e. ¿Cuánto tiempo pasó entre la fecha de su chequeo y la fecha de su primera cita para el tratamiento?

1 <2 semanas2 2 semanas-1 mes3 1-3 meses4 3-6 meses5 6 meses-1 año6 >1 año9 No sabe

21f. ¿Fue informada de sus resultados?

1 S0 N21f1. De ser Sí, ¿Qué le dijeron?  
\_\_\_\_\_

21g. ¿Se le pidió que regrese para realizar un seguimiento?

1 S0 N

21g1. De ser así, ¿Cuál es la frecuencia del seguimiento? \_\_\_\_\_

**Si no recibió tratamiento:**

21h. ¿Por qué no recibió un seguimiento?

21h1. No sabía a donde ir 1 S 0 N21h2. Era difícil llegar al lugar 1 S 0 N21h3. El costo era muy alto 1 S 0 N21h4. No pensó que el tratamiento era importante 1 S 0 N21h5. No tenía tiempo 1 S 0 N21h6. Ansiedad/ Miedo 1 S 0 N21h7. Otro (especificar) \_\_\_\_\_ 1 S 0 N



## 22. ¿Alguna vez dio positivo para VIH?

1 S0 N Si no, pase a la 2322<sup>a</sup>1. De ser Sí, ¿Dónde se realizó el examen positivo?1 Centro de Salud Alberto Barton del Callao2 Otro lugar en Peru \_\_\_\_\_3 Otro país \_\_\_\_\_22<sup>a</sup>2. ¿Recibió tratamiento?1 S0 N Si no, pase a la 22h.

De ser Sí:

22b. ¿Qué tratamiento recibió?

22b1. Medicina Oral 1 S 0 N22b2. Medicina por inyección 1 S 0 N22b3. Colposcopia 1 S 0 N22b4. Cirugía 1 S 0 N22b5. Consejería 1 S 0 N22b6. No sabe 1 S 0 N

22c. ¿Dónde recibió el tratamiento?

22c1. Clínica Barton 1 S 0 N22c2. Centro de derivación 1 S 0 N22c3. Hospital Local 1 S 0 N22c4. Otro \_\_\_\_\_ 1 S 0 N

22d. ¿Por qué fue a ese lugar?

22d1. Clínica de derivación 1 S 0 N22d2. Ubicación conveniente 1 S 0 N22d3. Amigo lo recomendó 1 S 0 N22d4. Otro \_\_\_\_\_ 1 S 0 N

22e. ¿Cuánto tiempo pasó entre la fecha de su chequeo y la fecha de su primera cita para el tratamiento?

1 <2 semanas2 2 semanas-1 mes3 1-3 meses4 3-6 meses5 6 meses-1 año6 >1 año9 No sabe

22f. ¿Fue informada de sus resultados?

1 S0 N22f1. De ser Sí, ¿Qué le dijeron?  
\_\_\_\_\_

22g. ¿Se le pidió que regrese para realizar un seguimiento?

1 S0 N

22g1. De ser así, ¿Cuál es la frecuencia del seguimiento? \_\_\_\_\_

## Si no recibió tratamiento:

22h. ¿Por qué no recibió un seguimiento?

22h1. No sabía a donde ir 1 S 0 N22h2. Era difícil llegar al lugar 1 S 0 N22h3. El costo era muy alto 1 S 0 N22h4. No pensó que el tratamiento era importante 1 S 0 N22h5. No tenía tiempo 1 S 0 N22h6. Ansiedad/ Miedo 1 S 0 N22h7. Otro (especificar) \_\_\_\_\_ 1 S 0 N

**Otras ETS**

23. ¿Alguna vez dio positivo para una ETS que no fue mencionada? 1 S 0 N Si no, pase a la IV

23<sup>a</sup>1. De ser Sí, ¿Dónde se realizó el examen positivo?

1 Centro de Salud Alberto Barton del Callao

2 Otro lugar en Peru \_\_\_\_\_

3 Otro país \_\_\_\_\_

23<sup>a</sup>2. ¿Recibió tratamiento?

1 S

0 N Si no, pase a la 23h.

De ser Sí:

23b. ¿Qué tratamiento recibió?

23b1. Medicina Oral 1 S 0 N

23b2. Medicina por inyección 1 S 0 N

23b3. Colposcopia 1 S 0 N

23b4. Cirugía 1 S 0 N

23b5. Consejería 1 S 0 N

23b6. No sabe 1 S 0 N

23c. ¿Dónde recibió el tratamiento?

23c1. Clínica Barton 1 S 0 N

23c2. Centro de derivación 1 S 0 N

23c3. Hospital Local 1 S 0 N

23c4. Otro \_\_\_\_\_ 1 S 0 N

23d. ¿Por qué fue a ese lugar?

23d1. Clínica de derivación 1 S 0 N

23d2. Ubicación conveniente 1 S 0 N

23d3. Amigo lo recomendó 1 S 0 N

23d4. Otro \_\_\_\_\_ 1 S 0 N

23e. ¿Cuánto tiempo pasó entre la fecha de su chequeo y la fecha de su primera cita para el tratamiento?

1 <2 semanas

2 2 semanas-1 mes

3 1-3 meses

4 3-6 meses

5 6 meses-1 año

6 >1 año

9 No sabe

23f. ¿Fue informada de sus resultados?

1 S

0 N

22f1. De ser Sí, ¿Qué le dijeron?

\_\_\_\_\_

23g. ¿Se le pidió que regrese para realizar un seguimiento?

1 S

0 N

23g1. De ser así, ¿Cuál es la frecuencia del seguimiento?

\_\_\_\_\_

**Si no recibió tratamiento:**

23h. ¿Por qué no recibió un seguimiento?

23h1. No sabía a donde ir 1 S 0 N

23h2. Era difícil llegar al lugar 1 S 0 N

23h3. El costo era muy alto 1 S 0 N

23h4. No pensó que el tratamiento era importante 1 S 0 N

23h5. No tenía tiempo 1 S 0 N

23h6. Ansiedad/ Miedo 1 S 0 N

23h7. Otro (especificar) \_\_\_\_\_ 1 S 0 N

## Sección IV – Factores emocionales y psicológicos

**Si el paciente dio positivo para VPH, por favor complete la siguiente sección:**

**Respecto a sus resultados positivos para VPH:**

24. Es importante tener un seguimiento para mis resultado(s) positivos.

|                   |                                       |   |   |                   |
|-------------------|---------------------------------------|---|---|-------------------|
| 1                 | 2                                     | 3 | 4 | 5                 |
| <i>Desacuerdo</i> | <i>Ni de acuerdo ni en desacuerdo</i> |   |   | <i>De acuerdo</i> |

25. Estoy consciente de las posibles consecuencias del(los) diagnóstico(s) sobre mi salud.

|                   |                                       |   |   |                   |
|-------------------|---------------------------------------|---|---|-------------------|
| 1                 | 2                                     | 3 | 4 | 5                 |
| <i>Desacuerdo</i> | <i>Ni de acuerdo ni en desacuerdo</i> |   |   | <i>De acuerdo</i> |

26. Mi infección es tratable.

|                   |                                       |   |   |                   |
|-------------------|---------------------------------------|---|---|-------------------|
| 1                 | 2                                     | 3 | 4 | 5                 |
| <i>Desacuerdo</i> | <i>Ni de acuerdo ni en desacuerdo</i> |   |   | <i>De acuerdo</i> |

27. Me siento cómoda durante el examen médico.

|                   |                                       |   |   |                   |
|-------------------|---------------------------------------|---|---|-------------------|
| 1                 | 2                                     | 3 | 4 | 5                 |
| <i>Desacuerdo</i> | <i>Ni de acuerdo ni en desacuerdo</i> |   |   | <i>De acuerdo</i> |

28. Me siento cómoda con los médicos.

|                   |                                       |   |   |                   |
|-------------------|---------------------------------------|---|---|-------------------|
| 1                 | 2                                     | 3 | 4 | 5                 |
| <i>Desacuerdo</i> | <i>Ni de acuerdo ni en desacuerdo</i> |   |   | <i>De acuerdo</i> |

29. Me siento avergonzada con mi(s) diagnóstico(s).

|                   |                                       |   |   |                   |
|-------------------|---------------------------------------|---|---|-------------------|
| 1                 | 2                                     | 3 | 4 | 5                 |
| <i>Desacuerdo</i> | <i>Ni de acuerdo ni en desacuerdo</i> |   |   | <i>De acuerdo</i> |

30. Me siento avergonzada de decir a otras personas sobre mi(s) diagnóstico(s).

|                   |                                       |   |   |                   |
|-------------------|---------------------------------------|---|---|-------------------|
| 1                 | 2                                     | 3 | 4 | 5                 |
| <i>Desacuerdo</i> | <i>Ni de acuerdo ni en desacuerdo</i> |   |   | <i>De acuerdo</i> |

31. Temo que pueda pasar m(s)i diagnóstico(s) a otros.

|                   |                                       |   |   |                   |
|-------------------|---------------------------------------|---|---|-------------------|
| 1                 | 2                                     | 3 | 4 | 5                 |
| <i>Desacuerdo</i> | <i>Ni de acuerdo ni en desacuerdo</i> |   |   | <i>De acuerdo</i> |

32. Temo desarrollar consecuencias adversas de largo plazo (como cáncer, infertilidad) como resultado de mi (s) diagnóstico(s).

|                   |                                       |   |   |                   |
|-------------------|---------------------------------------|---|---|-------------------|
| 1                 | 2                                     | 3 | 4 | 5                 |
| <i>Desacuerdo</i> | <i>Ni de acuerdo ni en desacuerdo</i> |   |   | <i>De acuerdo</i> |

33. Mi médico (doctor/enfermera/trabajador social) respondieron mis preguntas sobre mis resultados positivos.

|                   |                                       |   |   |                   |
|-------------------|---------------------------------------|---|---|-------------------|
| 1                 | 2                                     | 3 | 4 | 5                 |
| <i>Desacuerdo</i> | <i>Ni de acuerdo ni en desacuerdo</i> |   |   | <i>De acuerdo</i> |

34. Mi médico (doctor/enfermera/trabajador social) me explicó cómo obtener tratamiento para mis resultados positivos.

|                   |                                       |   |   |                   |
|-------------------|---------------------------------------|---|---|-------------------|
| 1                 | 2                                     | 3 | 4 | 5                 |
| <i>Desacuerdo</i> | <i>Ni de acuerdo ni en desacuerdo</i> |   |   | <i>De acuerdo</i> |

**Si el paciente dio positivo para una ETS diferente al VPH, por favor complete la siguiente sección:  
Respecto a sus resultados positivos para ETS's (otra diferente a VPH):**

35. Es importante tener un seguimiento para mis resultados positivos.

1                      2                                      3                                      4                                      5  
*Desacuerdo                      Ni de acuerdo ni en desacuerdo                                      De acuerdo*

36. Mi infección es tratable.

1                      2                                      3                                      4                                      5  
*Desacuerdo                      Ni de acuerdo ni en desacuerdo                                      De acuerdo*

37. Estoy consciente de las posibles consecuencias del diagnóstico sobre mi salud.

1                      2                                      3                                      4                                      5  
*Desacuerdo                      Ni de acuerdo ni en desacuerdo                                      De acuerdo*

38. Me siento cómoda durante el examen médico.

1                      2                                      3                                      4                                      5  
*Desacuerdo                      Ni de acuerdo ni en desacuerdo                                      De acuerdo*

39. Me siento cómoda con los médicos.

1                      2                                      3                                      4                                      5  
*Desacuerdo                      Ni de acuerdo ni en desacuerdo                                      De acuerdo*

40. Me siento avergonzada con mi diagnóstico.

1                      2                                      3                                      4                                      5  
*Desacuerdo                      Ni de acuerdo ni en desacuerdo                                      De acuerdo*

41. Me siento avergonzada de decir a otras personas sobre mi diagnóstico.

1                      2                                      3                                      4                                      5  
*Desacuerdo                      Ni de acuerdo ni en desacuerdo                                      De acuerdo*

42. Temo que pueda pasar mi diagnóstico a otros.

1                      2                                      3                                      4                                      5  
*Desacuerdo                      Ni de acuerdo ni en desacuerdo                                      De acuerdo*

43. Temo desarrollar consecuencias adversas de largo plazo (como cáncer, infertilidad) como resultado de mi diagnóstico.

1                      2                                      3                                      4                                      5  
*Desacuerdo                      Ni de acuerdo ni en desacuerdo                                      De acuerdo*

44. Mi médico (doctor/enfermera/trabajador social) respondieron mis preguntas sobre mis resultados positivos.

1                      2                                      3                                      4                                      5  
*Desacuerdo                      Ni de acuerdo ni en desacuerdo                                      De acuerdo*

45. Mi médico (doctor/enfermera/trabajador social) me explicó cómo obtener tratamiento para mis resultados positivos.

1                      2                                      3                                      4                                      5  
*Desacuerdo                      Ni de acuerdo ni en desacuerdo                                      De acuerdo*

## **Sección V – Preguntas abiertas**

***Si el paciente dio positivo para VPH, por favor llene la siguiente sección:***

46. Por favor, díganos qué es lo que entiende sobre el resultado positivo del VPH que recibió y las posibles consecuencias para su salud.

47. Si continuó con el seguimiento del VPH:

Por favor, díganos por qué decidió seguir con el tratamiento.

48. Si no continuó con el seguimiento del VPH

Por favor, díganos que le impidió seguir con el tratamiento.

***Si el paciente dio positivo para otra ETS, por favor llene la siguiente sección:***

49. Por favor, díganos que entiende sobre sus resultados positivos para una ETS (diferente al VPH) y las posibles consecuencias sobre su salud.

50. Si continuó con el seguimiento de la ETS

Por favor, díganos por qué decidió seguir con el tratamiento.

51. Si no continuó con el seguimiento de la ETS:

Por favor, díganos que le impidió seguir con el tratamiento.
